# Supplementary material for: Cp* non-innocence and the implications of (η4-Cp*H)Rh intermediates in the hydrogenation of CO2, NAD+, amino-borane, and the Cp* framework – a computational study
Source: Royal Society of Chemistry journal article supplement (doi:10.1039/d2dt03611h), 2022-12-23
Supplement: d2dt03611h1.zip [file d2dt03611h1.zip]

## Sheet: Computational Tables
Table S1: Solubilities of H2 and CO2 at higher pressures
		Conc. (M)	Notes
H2, 2 MPa in water		0.0180062	Solubility of H2 in water at 2 MPa H2 pressure is 0.44 cc/g of water
CO2, 2 MPa in water		0.58111	Solubility of CO2 in water at 2 MPa CO2 pressure is 14.2 cc/g of water
H2, 4 MPa in THF		0.122514	Molefraction solubility of H2 in THF at 4 MPa H2 pressure is 0.00996
Table S2: Free energy corrections
	ΔG (DFT) (Hartree)	conc. (M)	Correction (kcal/mol)	ΔGcorrected a.u.	Notes
H2O	-76.4522	55.55	4.27785	-76.4454	SSC
H2 (2 MPa in water)	-1.17073	0.0180062	-0.486505	-1.1715	SSC
CO2 (2 MPa CO2 pressure)	-188.658	0.58111	1.57371	-188.655	SSC
OH-(aq)3	-305.31	-	-	-305.31	DFT calculated OH- with explisit solvation with three water molecules (aq)
OH-(aq)3, 1 M in water	-305.31	1	1.8956	-305.307	ΔG(solv, 1 M) = ΔG(solvated) + SSC
THF	-232.416	12.3	3.38379	-232.411	SSC
DMAB	-161.781	4	2.71767	-161.776	SSC
H2 (4 MPa in THF)	-1.17288	0.122514	0.65058	-1.17185	SSC
Table S3: Free Energy profile for the formation of 1, 2 and 3 in 1 M aqueous OH-
Species	ΔG (Hartree)				SUM (Hartree)	REL (kcal/mol)	Notes
4 + H2 + OH-(aq)3 + 3 H2O	-1071.81	-1.1715	-305.307	-229.336	-1607.63	0	Starting materials
5 + 2 OH-(aq)3 + H2	-995.823	-610.614	-1.1715		-1607.61	12.3185	Dissociation of OH- from Rh(III)-center of 4
6 + 2 OH-(aq)3	-996.986	-610.614			-1607.6	17.7892	Formation of Rh-η2(H2) int.
TS1 + H2O + OH-(aq)3	-1225.84	-76.4454	-305.307		-1607.59	25.022	TS for deprotonation of Rh-η2(H2) fragment
1 + 4 H2O + OH-(aq)3	-996.545	-305.781	-305.307		-1607.63	-3.37369	Formation of Rh(III)-H
TS2 + 4 H2O + OH-(aq)3	-996.518	-305.781	-305.307		-1607.61	13.5914	TS for reductive elimination of the Cp*-H pair
2 + 4 H2O + OH-(aq)3	-996.546	-305.781	-305.307		-1607.63	-4.25972	Formation of Cp*H(endo) Rh(I) complex
TS3 + 5 H2O	-1225.39	-382.227			-1607.62	7.19366	TS for reductive deprotonation of Rh(III)-H
7 + 8 H2O	-996.081	-611.563			-1607.64	-9.99051	Formation of Cp*Rh(I) int. via deprot of Rh-H of 1
TS4 + 5 H2O	-1225.38	-382.227			-1607.6	15.365	TS for protonation of Cp* fragment of 7 in exo manner
TS5 + 5 H2O	-1225.37	-382.227			-1607.6	17.917	TS for protonation of the Cp* fragment of 7 in endo manner
3 + OH-(aq)3 + 4 H2O	-996.547	-305.307	-305.781		-1607.64	-4.54084	Formation of Cp*H(exo) Rh(I) int.
Table S4: Free energy profile for the hydrogenation of CO2
Species	ΔG (Hartree)				SUM (Hartree)	REL (kcal/mol)	Notes
1 + CO2 + OH-(aq)3	-996.545	-188.655	-305.307		-1490.51	0	Rh(III)-H intermediate
TS6 + OH-(aq)3	-1185.18	-305.307			-1490.49	11.7029	TS for direct hydride transfer to CO2
5 + HCOO- + OH-(aq)3	-995.823	-189.367	-305.307		-1490.5	6.11128	Formation of 5-coordinate Rh(III) int. and formate
8 + OH-(aq)3	-1185.2	-305.307			-1490.5	1.63093	Coordination of formate to Rh(III)-center of 5
2 + CO2 + OH-(aq)3	-996.546	-188.655	-305.307		-1490.51	-0.88603	endo Cp*H intermediate
TS7 + OH-(aq)3	-1185.14	-305.307			-1490.45	35.622	TS for hydride transfer from endo Cp*H to CO2
3 + CO2 + OH-(aq)3	-996.547	-188.655	-305.307		-1490.51	-1.16715	exo Cp*H intermediate
TS8 + OH-(aq)3	-1185.16	-305.307			-1490.47	25.5933	TS for hydride transfer from exo Cp*H to CO2
4 + HCOO- + 3 H2O	-1071.81	-189.367	-229.336		-1490.52	-6.20718	Formation of formate and reinstatement of 4
Table S5: Barriers for hydride delivery to NAD+ from 1, 2 and 3
Species	ΔG (Hartree)				SUM (Hartree)	REL (kcal/mol)	Notes
4 + HCOO- + NAD+ + 3 H2O	-1071.81	-189.367	-456.753	-229.336	-1947.27	0	Starting materials
TS9 + OH- + CO2	-1453.29	-305.307	-188.658		-1947.25	11.2323	TS for direct hydride transfer to NAD+
TS10 + OH- + CO2	-1453.25	-305.307	-188.658		-1947.21	37.6036	TS for hydride transfer from endo Cp*H to NAD+
TS11 + OH- + CO2	-1453.26	-305.307	-188.658		-1947.23	26.0682	TS for hydride transfer from exo Cp*H to NAD+
Table S6: Energy profile for the hydrogenation of the Cp* framework in the reaction with DMAB in the presence of H2 in THF
Species	ΔG (Hartree)				SUM (Hartree)	REL (kcal/mol)	Notes
9' + DMAB + H2	-1228.22	-161.776	-1.17185		-1391.17	12.555	Cp*Rh-THF complex + dimethylamine-borane + H2
1' + Me2NHBH2-THF + H2	-996.556	-393.458	-1.17185		-1391.19	0	Formation of Rh(III)-H intermediate and [Me2NH-BH2THF]+
2' + Me2NHBH2-THF + H2	-996.555	-393.458	-1.17185		-1391.18	0.325672	Formation of (Cp*H)Rh intermediate
10' + Me2NHBH2-THF	-997.718	-393.458			-1391.18	5.8522	Formation of η1-(H2) (Cp*H) Rh intermediate
TS12' + Me2NHBH2-THF	-997.686	-393.458			-1391.14	26.0502	TS for oxidative addition of H2
11' + Me2NHBH2-THF	-997.687	-393.458			-1391.15	25.2708	Formation of (Cp*H) Rh(III) dihydride
TS13' + Me2NHBH2-THF	-997.685	-393.458			-1391.14	26.9193	TS for insertion of Cp*H in Rh(III)-H fragment
12' + Me2NHBH2-THF	-997.698	-393.458			-1391.16	18.6632	Formation of η3-allylic Cp*H2 Rh(III)-H intermediate
TS14' + Me2NHBH2-THF	-997.69	-393.458			-1391.15	23.4329	TS for C-H reductive coupling
13' + Me2NHBH2-THF	-997.702	-393.458			-1391.16	15.7686	Formation of η2-Cp*H3 Rh(I) intermediate
Table S7: Energy profile for the hydrogenation of the Cp* framework with H2 in water
Species	ΔG (Hartree)				SUM (Hartree)	REL (kcal/mol)	Notes
4 + 2 H2	-1071.81	-2.34301			-1074.16	4.25972	Cp*Rh-OH complex + 2 H2
1 + H2 + H2O	-996.545	-1.1715	-76.4454		-1074.16	0.88603	Formation of Rh(III)-H intermediate and H2O
2 + H2 + H2O	-996.546	-1.1715	-76.4454		-1074.16	0	Formation of (Cp*H)Rh intermediate
10 + H2O	-997.708	-76.4454			-1074.15	5.9834	Formation of η1-(H2) (Cp*H) Rh intermediate
TS12 + H2O	-997.674	-76.4454			-1074.12	27.3397	TS for oxidative addition of H2
11 + H2O	-997.676	-76.4454			-1074.12	26.3044	Formation of (Cp*H) Rh(III) dihydride
TS13 + H2O	-997.673	-76.4454			-1074.12	27.9377	TS for insertion of Cp*H in Rh(III)-H fragment
12 + H2O	-997.691	-76.4454			-1074.14	16.9916	Formation of η3-allylic Cp*H2 Rh(III)-H intermediate
TS14 + H2O	-997.681	-76.4454			-1074.13	22.9441	TS for C-H reductive coupling
13 + H2O	-997.693	-76.4454			-1074.14	15.8195	Formation of η2-Cp*H3 Rh(I) intermediate
